# Supplementary material
Source: HighWire-hosted journal article supplement (https://hw-f5-jim.highwire.org/content/jim-2020-001683)
Supplement: inline-supplementary-material-1 [file inline-supplementary-material-1.pdf]

**Table S1** Risk of Preterm Birth Stratified by Variables using Cox Regression Model

| Stratified                                 | With antidepressants |           |                                | Without antidepressants (matched) |           |                                | With vs. Without (matched) |              |              |        |
|--------------------------------------------|----------------------|-----------|--------------------------------|-----------------------------------|-----------|--------------------------------|----------------------------|--------------|--------------|--------|
|                                            | Event                | PMs       | Rate (per 10 <sup>3</sup> PMs) | Event                             | PMs       | Rate (per 10 <sup>3</sup> PMs) | Ratio                      | Adjusted HR* | 95% CI       | P      |
| <b>Total</b>                               | 87                   | 16,373.60 | 5.31                           | 55                                | 16,381.25 | 3.36                           | 1.582                      | 1.762        | 1.351-2.294  | <0.001 |
| <b>1<sup>st</sup> pregnancy</b>            |                      |           |                                |                                   |           |                                |                            |              |              |        |
| Yes                                        | 55                   | 8,124.68  | 6.77                           | 34                                | 8,135.27  | 4.18                           | 1.620                      | 1.805        | 1.384-2.350  | <0.001 |
| No                                         | 32                   | 8,248.92  | 3.88                           | 21                                | 8,245.98  | 2.55                           | 1.524                      | 1.698        | 1.301-2.111  | <0.001 |
| <b>Age group (years)</b>                   |                      |           |                                |                                   |           |                                |                            |              |              |        |
| 18–34                                      | 29                   | 2,632.48  | 11.02                          | 29                                | 2,659.20  | 10.91                          | 1.010                      | 1.124        | 0.862-1.467  | 0.481  |
| 35–55                                      | 58                   | 13,741.12 | 4.22                           | 26                                | 13,722.05 | 1.89                           | 2.227                      | 2.481        | 1.903-3.231  | <0.001 |
| <b>Insured premium (New Taiwan Dollar)</b> |                      |           |                                |                                   |           |                                |                            |              |              |        |
| <18,000                                    | 79                   | 16,160.90 | 4.89                           | 50                                | 16,158.23 | 3.09                           | 1.580                      | 1.760        | 1.351-2.291  | <0.001 |
| 18,000–34,999                              | 5                    | 128.70    | 38.85                          | 3                                 | 127.25    | 23.58                          | 1.648                      | 1.834        | 1.407-2.392  | <0.001 |
| ≥35,000                                    | 3                    | 84.00     | 35.71                          | 2                                 | 95.77     | 20.88                          | 1.710                      | 1.903        | 1.462-2.483  | <0.001 |
| <b>Anxiety disorder</b>                    |                      |           |                                |                                   |           |                                |                            |              |              |        |
| Without                                    | 36                   | 8,532.87  | 4.22                           | 24                                | 8,536.14  | 2.81                           | 1.501                      | 1.673        | 1.282-2.177  | <0.001 |
| With                                       | 51                   | 7,840.73  | 6.50                           | 31                                | 7,845.11  | 3.95                           | 1.645                      | 1.834        | 1.405-2.386  | <0.001 |
| <b>Multiple gestation</b>                  |                      |           |                                |                                   |           |                                |                            |              |              |        |
| Without                                    | 83                   | 16,314.63 | 5.09                           | 54                                | 16,318.66 | 3.31                           | 1.538                      | 1.713        | 1.314-2.231  | <0.001 |
| With                                       | 4                    | 58.97     | 67.83                          | 1                                 | 62.59     | 15.98                          | 4.245                      | 4.725        | 3.622-6.148  | <0.001 |
| <b>Diabetes mellitus</b>                   |                      |           |                                |                                   |           |                                |                            |              |              |        |
| Without                                    | 70                   | 13,850.93 | 5.05                           | 53                                | 13,851.11 | 3.83                           | 1.320                      | 1.470        | 1.127-1.914  | <0.001 |
| With                                       | 17                   | 2,522.67  | 6.74                           | 2                                 | 2,530.14  | 0.79                           | 8.527                      | 9.425        | 7.288-12.648 | <0.001 |
| <b>Hypertension</b>                        |                      |           |                                |                                   |           |                                |                            |              |              |        |

|                                               |    |           |        |    |           |       |       |       |             |        |
|-----------------------------------------------|----|-----------|--------|----|-----------|-------|-------|-------|-------------|--------|
| Without                                       | 68 | 12,690.77 | 5.36   | 48 | 12,691.04 | 3.78  | 1.417 | 1.572 | 1.210-2.059 | <0.001 |
| With                                          | 19 | 3,682.83  | 5.16   | 7  | 3,690.21  | 1.90  | 2.720 | 3.011 | 2.318-3.975 | <0.001 |
| <b>Dyslipidemia</b>                           |    |           |        |    |           |       |       |       |             |        |
| Without                                       | 74 | 14,873.47 | 4.98   | 53 | 14,872.31 | 3.56  | 1.397 | 1.579 | 1.182-2.027 | <0.001 |
| With                                          | 13 | 1,500.13  | 8.67   | 2  | 1,508.94  | 1.33  | 6.541 | 7.101 | 5.483-9.120 | <0.001 |
| <b>Uteroplacental ischemia and hemorrhage</b> |    |           |        |    |           |       |       |       |             |        |
| Without                                       | 87 | 16,373.60 | 5.31   | 55 | 16,381.25 | 3.36  | 1.582 | 1.762 | 1.351-2.294 | <0.001 |
| With                                          | 0  | 0         | -      | 0  | 0         | -     | -     | -     | -           | -      |
| <b>Reproductive tract infection</b>           |    |           |        |    |           |       |       |       |             |        |
| Without                                       | 84 | 16,306.71 | 5.15   | 54 | 16,312.43 | 3.31  | 1.556 | 1.730 | 1.325-2.258 | <0.001 |
| With                                          | 3  | 66.89     | 44.85  | 1  | 68.82     | 14.53 | 3.087 | 3.421 | 2.638-4.422 | <0.001 |
| <b>Preeclampsia</b>                           |    |           |        |    |           |       |       |       |             |        |
| Without                                       | 84 | 16,346.70 | 5.14   | 55 | 16,360.60 | 3.36  | 1.529 | 1.703 | 1.306-2.214 | <0.001 |
| With                                          | 3  | 26.90     | 111.54 | 0  | 20.65     | 0     | ∞     | ∞     | -           | 0.998  |
| <b>Eclampsia</b>                              |    |           |        |    |           |       |       |       |             |        |
| Without                                       | 87 | 16,373.60 | 5.31   | 55 | 16,381.25 | 3.36  | 1.582 | 1.762 | 1.351-2.294 | <0.001 |
| With                                          | 0  | 0         | -      | 0  | 0         | -     | -     | -     | -           | -      |
| <b>Placenta previa</b>                        |    |           |        |    |           |       |       |       |             |        |
| Without                                       | 86 | 16,337.60 | 5.26   | 55 | 16,346.14 | 3.36  | 1.563 | 1.741 | 1.333-2.268 | <0.001 |
| With                                          | 1  | 36.00     | 27.78  | 0  | 35.11     | 0     | ∞     | ∞     | -           | 0.996  |
| <b>Abruptio placenta</b>                      |    |           |        |    |           |       |       |       |             |        |
| Without                                       | 87 | 16,373.60 | 5.31   | 55 | 16,381.25 | 3.36  | 1.582 | 1.762 | 1.351-2.294 | <0.001 |
| With                                          | 0  | 0         | -      | 0  | 0         | -     | -     | -     | -           | -      |
| <b>Polycystic ovaries</b>                     |    |           |        |    |           |       |       |       |             |        |
| Without                                       | 87 | 16,352.62 | 5.32   | 55 | 16,371.41 | 3.36  | 1.584 | 1.763 | 1.352-2.299 | <0.001 |

|                                              |    |           |      |    |           |      |       |       |             |        |
|----------------------------------------------|----|-----------|------|----|-----------|------|-------|-------|-------------|--------|
| With                                         | 0  | 20.98     | 0    | 0  | 9.84      | 0    | ∞     | ∞     | -           | 0.995  |
| <b>Hypogonadism</b>                          |    |           |      |    |           |      |       |       |             |        |
| Without                                      | 87 | 16,373.60 | 5.31 | 55 | 16,381.25 | 3.36 | 1.582 | 1.762 | 1.351-2.294 | <0.001 |
| With                                         | 0  | 0         | -    | 0  | 0         | -    | -     | -     | -           | -      |
| <b>Hypergonadism</b>                         |    |           |      |    |           |      |       |       |             |        |
| Without                                      | 87 | 16,373.60 | 5.31 | 55 | 16,381.25 | 3.36 | 1.582 | 1.762 | 1.351-2.294 | <0.001 |
| With                                         | 0  | 0         | -    | 0  | 0         | -    | -     | -     | -           | -      |
| <b>Pregnancy with history of infertility</b> |    |           |      |    |           |      |       |       |             |        |
| Without                                      | 87 | 16,340.46 | 5.32 | 55 | 16,357.30 | 3.36 | 1.582 | 1.763 | 1.353-2.294 | <0.001 |
| With                                         | 0  | 33.14     | 0    | 0  | 23.95     | 0    | ∞     | ∞     | -           | 0.998  |
| <b>Morbid obesity or overweight</b>          |    |           |      |    |           |      |       |       |             |        |
| Without                                      | 87 | 16,363.74 | 5.32 | 55 | 16,370.37 | 3.36 | 1.583 | 1.764 | 1.355-2.297 | <0.001 |
| With                                         | 0  | 9.86      | 0    | 0  | 10.88     | 0    | ∞     | ∞     | -           | 0.999  |
| <b>Urbanization level</b>                    |    |           |      |    |           |      |       |       |             |        |
| 1 (highest)                                  | 34 | 5,605.25  | 6.07 | 25 | 5,608.13  | 4.46 | 1.362 | 1.346 | 1.128-1.973 | <0.001 |
| 2                                            | 37 | 7,578.41  | 4.88 | 23 | 7,579.11  | 3.03 | 1.608 | 1.793 | 1.377-2.345 | <0.001 |
| 3                                            | 8  | 1,027.20  | 7.79 | 4  | 1,028.34  | 3.89 | 2.003 | 2.234 | 1.712-2.906 | <0.001 |
| 4 (lowest)                                   | 8  | 2,162.74  | 3.70 | 3  | 2,165.67  | 1.39 | 2.671 | 2.971 | 2.280-3.875 | <0.001 |
| <b>Level of care</b>                         |    |           |      |    |           |      |       |       |             |        |
| Hospital center                              | 28 | 5,456.31  | 5.13 | 23 | 5,462.30  | 4.21 | 1.218 | 1.357 | 1.040-1.769 | 0.011  |
| Regional hospital                            | 36 | 7,253.70  | 4.96 | 21 | 7,248.26  | 2.90 | 1.712 | 1.908 | 1.464-2.488 | <0.001 |
| Local hospital                               | 23 | 3,663.59  | 6.28 | 11 | 3,670.69  | 3.00 | 2.096 | 2.311 | 1.782-3.048 | <0.001 |

Abbreviations: CI, confidence interval; HR, hazard ratio; PMs, person-months

\* Adjusted for variables including age, income-related insurance premium, hospital types, urbanization levels, nulliparity or multiparity, multiple gestation, diabetes mellitus, hypertension, dyslipidemia, uteroplacental ischemia or hemorrhage, reproductive tract infection, preeclampsia, eclampsia, placenta previa, abruptio placenta, polycystic ovaries, hypogonadism, hypergonadism, pregnancy with history of infertility, morbid obesity or being overweight, and anxiety disorders excluding stratified variables.

**Table S2** Risk of Preterm Birth, by Different Definitions of Preterm Birth

| Preterm birth         | Antidepressants         | Population | Event | PMs       | Rate (per 10 <sup>3</sup> PMs) | Adjusted HR* | 95% CI      | P      |
|-----------------------|-------------------------|------------|-------|-----------|--------------------------------|--------------|-------------|--------|
| <37 gestational weeks | Without antidepressants | 1,789      | 55    | 16,381.25 | 3.36                           | Reference    |             |        |
|                       | With antidepressants    | 1,789      | 87    | 16,373.60 | 5.31                           | 1.762        | 1.351–2.294 | <0.001 |
| ≤35 gestational weeks | Without antidepressants | 1,789      | 52    | 16,379.45 | 3.17                           | Reference    |             |        |
|                       | With antidepressants    | 1,789      | 85    | 16,371.88 | 5.19                           | 1.820        | 1.395–3.093 | <0.001 |

Note. CI, confidence interval; HR, hazard ratio; PMs, person-months.

\*Adjusted for variables including age, income-related insurance premium, hospital types, urbanization levels, nulliparity or multiparity, multiple gestation, diabetes mellitus, hypertension, dyslipidemia, uteroplacental ischemia or hemorrhage, reproductive tract infection, preeclampsia, eclampsia, placenta previa, abruptio placenta, polycystic ovaries, hypogonadism, hypergonadism, pregnancy with history of infertility, morbid obesity or being overweight, and anxiety disorders.

**Table S3** Risk of Preterm Birth in the Original Cohort Without Matching but Adjusted for All Potential Confounders

|                 | With antidepressants |       |           |                                      | Without antidepressants |       |           |                                      | With vs. Without |                |             |        |
|-----------------|----------------------|-------|-----------|--------------------------------------|-------------------------|-------|-----------|--------------------------------------|------------------|----------------|-------------|--------|
|                 | Population           | Event | PMs       | Rate<br>(per 10 <sup>3</sup><br>PMs) | Population              | Event | PMs       | Rate<br>(per 10 <sup>3</sup><br>PMs) | Ratio            | Adjusted<br>HR | 95% CI      | P      |
| Original cohort | 1,789                | 87    | 16,373.60 | 5.31                                 | 8,825                   | 297   | 80,812.67 | 3.67                                 | 1.446            | 1.510          | 1.137-1.982 | <0.001 |
| 1:1 matching    | 1,789                | 87    | 16,373.60 | 5.31                                 | 1,789                   | 55    | 16,381.25 | 3.36                                 | 1.582            | 1.762          | 1.351-2.294 | <0.001 |

Note. CI, confidence interval; HR, hazard ratio; PMs, person-months.

\*Adjusted for variables including age, income-related insurance premium, hospital types, urbanization levels, nulliparity or multiparity, multiple gestation, diabetes mellitus, hypertension, dyslipidemia, uteroplacental ischemia or hemorrhage, reproductive tract infection, preeclampsia, eclampsia, placenta previa, abruptio placenta, polycystic ovaries, hypogonadism, hypergonadism, pregnancy with history of infertility, morbid obesity or being overweight, and anxiety disorders.
